# Supplementary material for: fluff: exploratory analysis and visualization of high-throughput sequencing data
Source: PeerJ. 2016 Jul 19;4:e2209. doi: 10.7717/peerj.2209 (PMC4957989; doi:10.7717/peerj.2209)
Supplement: Table S1 [file peerj-04-2209-s001.xlsx]

## Sheet: Sheet1
chr1	2512531	2512779
chr1	6569687	6570171
chr1	7870159	7870607
chr1	7870657	7872440
chr1	8457267	8457719
chr1	9337823	9340472
chr1	9340523	9341920
chr1	10124992	10126051
chr1	10388031	10390071
chr1	10964640	10965203
chr1	12585104	12585547
chr1	12585591	12586224
chr1	15068223	15068844
chr1	15199736	15200362
chr1	15322955	15323310
chr1	15562968	15563401
chr1	15563584	15563933
chr1	15791077	15791360
chr1	16723896	16724250
chr1	19566589	19567053
chr1	19567455	19567707
chr1	19582927	19585388
chr1	19585982	19587801
chr1	19644217	19644581
chr1	19645243	19645752
chr1	19839346	19839594
chr1	23515102	23515546
chr1	23916356	23917042
chr1	24453051	24453418
chr1	25020611	25021013
chr1	25060057	25060332
chr1	25120702	25121162
chr1	25130414	25130854
chr1	25131625	25133584
chr1	25863183	25863675
chr1	25863790	25864566
chr1	26129625	26132957
chr1	26133690	26134294
chr1	26134375	26134653
chr1	26135124	26136240
chr1	26136311	26137000
chr1	26884515	26885037
chr1	26885182	26885438
chr1	27374264	27374589
chr1	27400334	27401561
chr1	27421044	27422964
chr1	27848016	27848437
chr1	27869032	27869998
chr1	27942295	27942541
chr1	28607395	28608179
chr1	31107965	31108242
chr1	32261371	32261632
chr1	33826680	33828640
chr1	36581695	36582124
chr1	36584475	36585944
chr1	36705676	36706074
chr1	38800844	38801122
chr1	39580578	39580903
chr1	41039902	41041395
chr1	42001037	42001519
chr1	42001777	42002125
chr1	42136435	42136744
chr1	43111493	43111829
chr1	43795578	43796560
chr1	43811099	43811453
chr1	44913002	44913379
chr1	45130188	45131123
chr1	45736537	45736841
chr1	45738310	45739487
chr1	45800147	45800464
chr1	50562551	50563670
chr1	50731687	50732074
chr1	52006810	52007835
chr1	52103146	52103430
chr1	53587920	53588269
chr1	53588583	53588940
chr1	54637014	54637363
chr1	54692077	54692707
chr1	54692772	54698033
chr1	54702907	54705805
chr1	54706144	54708437
chr1	54712964	54717167
chr1	54717478	54717758
chr1	54717840	54718177
chr1	56795462	56795748
chr1	56795804	56796294
chr1	56988222	56989164
chr1	56990483	56991320
chr1	58899426	58899685
chr1	59255182	59256756
chr1	59271107	59271456
chr1	59295377	59295634
chr1	59298234	59298983
chr1	59299090	59299807
chr1	59314835	59315500
chr1	59321628	59322056
chr1	59322311	59322623
chr1	59324830	59327838
chr1	59375148	59375495
chr1	59495103	59495674
chr1	59527863	59528139
chr1	59545313	59545832
chr1	59737703	59738982
chr1	60170144	60174173
chr1	61720688	61721124
chr1	64279668	64280002
chr1	65407407	65407707
chr1	65628733	65631386
chr1	65631530	65632701
chr1	65632837	65633234
chr1	65676786	65677174
chr1	66404941	66406456
chr1	67409958	67410729
chr1	70970402	70971001
chr1	70975417	70975777
chr1	71284054	71284310
chr1	77737299	77737620
chr1	77737801	77738452
chr1	81391451	81391740
chr1	84612811	84613118
chr1	84691653	84692140
chr1	84804690	84806046
chr1	84813465	84813876
chr1	84814106	84814457
chr1	84825781	84826232
chr1	84826283	84826578
chr1	84830817	84832507
chr1	84880874	84881221
chr1	86762257	86762649
chr1	87222317	87224275
chr1	87258434	87259082
chr1	87663048	87663311
chr1	87663624	87664027
chr1	87668745	87669192
chr1	87669561	87669869
chr1	87670411	87670657
chr1	87674069	87674649
chr1	87674961	87675585
chr1	87689279	87690083
chr1	87690127	87691070
chr1	90006188	90006901
chr1	90010276	90011349
chr1	90012373	90012919
chr1	90012974	90013301
chr1	90013712	90014123
chr1	94034880	94035192
chr1	94035475	94035782
chr1	94056081	94058841
chr1	94071148	94071425
chr1	94072895	94073462
chr1	94073540	94074673
chr1	94130114	94130458
chr1	94159104	94159708
chr1	109910154	109910485
chr1	109981376	109982156
chr1	110184164	110184579
chr1	110367982	110368973
chr1	110433355	110433715
chr1	110443358	110444501
chr1	110445677	110446141
chr1	110953598	110954104
chr1	111400463	111400988
chr1	112010040	112011268
chr1	112134918	112135471
chr1	113000274	113000737
chr1	113531810	113532124
chr1	113534228	113534509
chr1	114666080	114666353
chr1	117035293	117035669
chr1	144707268	144707536
chr1	144891381	144891639
chr1	144892026	144892672
chr1	144979345	144979779
chr1	147209462	147210042
chr1	147824501	147826342
chr1	150113820	150114307
chr1	151887342	151888409
chr1	152003064	152003596
chr1	152004334	152004678
chr1	153581890	153583514
chr1	153743317	153744288
chr1	156072594	156074123
chr1	156509373	156511442
chr1	156630211	156631268
chr1	156631414	156632017
chr1	156659559	156663583
chr1	156668522	156668909
chr1	156669146	156669808
chr1	157079567	157079813
chr1	158404342	158404684
chr1	160136065	160136426
chr1	160278533	160280719
chr1	160340901	160341741
chr1	160341846	160342243
chr1	160443783	160445176
chr1	160965478	160966102
chr1	162044120	162044653
chr1	162044900	162045254
chr1	162056352	162057019
chr1	162057065	162058128
chr1	165635543	165636201
chr1	165638526	165639393
chr1	165639440	165641853
chr1	167052132	167052670
chr1	167640449	167641123
chr1	167642947	167643541
chr1	167862123	167862839
chr1	167873980	167874439
chr1	167874648	167875710
chr1	169017022	169018200
chr1	169021703	169022104
chr1	171789006	171789365
chr1	173401067	173401372
chr1	176072380	176072734
chr1	178108082	178108447
chr1	178137514	178137830
chr1	178246440	178248953
chr1	178250470	178251026
chr1	179171013	179172190
chr1	179268476	179268792
chr1	180578773	180582297
chr1	181081327	181081747
chr1	183876183	183876521
chr1	184566499	184567220
chr1	184567419	184567681
chr1	184915446	184916075
chr1	184986145	184986597
chr1	185468762	185469877
chr1	186964272	186964724
chr1	198431869	198432139
chr1	200283174	200283611
chr1	200283745	200284099
chr1	200288672	200289138
chr1	200481100	200481563
chr1	201413742	201414037
chr1	201414216	201414510
chr1	201419410	201421322
chr1	201429598	201432401
chr1	201433656	201433924
chr1	201445556	201445837
chr1	202379668	202380116
chr1	202380363	202380805
chr1	202720714	202720980
chr1	203183715	203184057
chr1	203184425	203185313
chr1	203207829	203209861
chr1	203493015	203493441
chr1	203493546	203494118
chr1	203495044	203495355
chr1	203497768	203498551
chr1	203498838	203499255
chr1	204072120	204073689
chr1	204073980	204074406
chr1	204126600	204127097
chr1	204127355	204127852
chr1	204404227	204404796
chr1	204404985	204405324
chr1	204450513	204451061
chr1	204499858	204500116
chr1	205481542	205481895
chr1	205675678	205676077
chr1	207534897	207535319
chr1	207535514	207537915
chr1	208025387	208025836
chr1	209782479	209782850
chr1	209877447	209877904
chr1	210013374	210014120
chr1	210519898	210520440
chr1	210520894	210521269
chr1	210546956	210547350
chr1	212575095	212576373
chr1	212655380	212657710
chr1	212703076	212703684
chr1	212742880	212743593
chr1	212748941	212749344
chr1	212749555	212749928
chr1	212753618	212753867
chr1	212754907	212757244
chr1	212759472	212761962
chr1	212762452	212763549
chr1	219255390	219255756
chr1	220080799	220081054
chr1	221130306	221130749
chr1	221613539	221614112
chr1	222160641	222162257
chr1	222163227	222165462
chr1	222166932	222169358
chr1	222169714	222170388
chr1	222170607	222171092
chr1	223996434	224000062
chr1	224521156	224523114
chr1	224866721	224867493
chr1	224867541	224867805
chr1	224894948	224897555
chr1	224898045	224898375
chr1	224898614	224899573
chr1	224934858	224935479
chr1	224935552	224936036
chr1	224937957	224938604
chr1	224938957	224939529
chr1	224946283	224948602
chr1	224957684	224958015
chr1	225507162	225508279
chr1	225648631	225649146
chr1	226537779	226538246
chr1	226813765	226816916
chr1	226816990	226817283
chr1	226817567	226817842
chr1	226818282	226824162
chr1	226846227	226846497
chr1	226895592	226898064
chr1	226919048	226920027
chr1	226922554	226922911
chr1	227073553	227073838
chr1	227074082	227074408
chr1	229482976	229483298
chr1	230960922	230961270
chr1	230961397	230961682
chr1	235623582	235624841
chr1	236071536	236074717
chr1	241670384	241670905
chr1	241769162	241769434
chr1	241785388	241786051
chr1	241786136	241787065
chr1	246319498	246319808
chr1	247520609	247521034
chr1	247521212	247521485
chr1	247529942	247532015
chr10	440719	440991
chr10	671278	671534
chr10	1330055	1330332
chr10	3078099	3078413
chr10	3864894	3865241
chr10	5820857	5821121
chr10	5821355	5821656
chr10	5902111	5903292
chr10	6134555	6134872
chr10	6135267	6135513
chr10	6881743	6883713
chr10	7066956	7067824
chr10	7298608	7298868
chr10	7379162	7379435
chr10	11581669	11582061
chr10	13160044	13160290
chr10	13757950	13758276
chr10	13811733	13811979
chr10	13812325	13812657
chr10	15205339	15205624
chr10	19957385	19957768
chr10	20278861	20279901
chr10	22722590	22723622
chr10	23846208	23846524
chr10	29632829	29633186
chr10	29633257	29633582
chr10	30040445	30040757
chr10	30040918	30041366
chr10	30508718	30509693
chr10	30931609	30931889
chr10	30932249	30932670
chr10	30939957	30940469
chr10	30940847	30941260
chr10	34082968	34083375
chr10	34695475	34695728
chr10	34695962	34696398
chr10	35329910	35330494
chr10	35680417	35681246
chr10	35697818	35698867
chr10	35701170	35701566
chr10	35701793	35703248
chr10	38149611	38149924
chr10	38149970	38150348
chr10	43666187	43666510
chr10	43801232	43801830
chr10	45656095	45656558
chr10	45745746	45746206
chr10	45751369	45751984
chr10	45752029	45752299
chr10	45752758	45753196
chr10	49684521	49684842
chr10	49969693	49970933
chr10	49978778	49979363
chr10	49979541	49979845
chr10	61990899	61991266
chr10	63511991	63512397
chr10	64476977	64477392
chr10	64495369	64496605
chr10	64569178	64570080
chr10	69426485	69426881
chr10	69913115	69913361
chr10	70976714	70976968
chr10	71162863	71163199
chr10	71163534	71163937
chr10	71199793	71200234
chr10	73083331	73084415
chr10	73084580	73085131
chr10	73098572	73099174
chr10	73099700	73100396
chr10	73294558	73294925
chr10	73345055	73345423
chr10	73349386	73350011
chr10	73364487	73364905
chr10	73745676	73746164
chr10	74610897	74611391
chr10	74612474	74612826
chr10	74965562	74966441
chr10	76684265	76684806
chr10	76830523	76830939
chr10	79933378	79933707
chr10	80760630	80761715
chr10	80937570	80942027
chr10	80949024	80949427
chr10	81835309	81835652
chr10	87988726	87989155
chr10	87989398	87989938
chr10	88740062	88740376
chr10	90792203	90792791
chr10	90795483	90795794
chr10	90846844	90847113
chr10	91620301	91620671
chr10	95179201	95179566
chr10	95200425	95203119
chr10	95217920	95219401
chr10	95220830	95221525
chr10	97156976	97157564
chr10	97160267	97160529
chr10	97505456	97505806
chr10	97549437	97549805
chr10	98984162	98985196
chr10	98988929	98990030
chr10	99253359	99254018
chr10	99262984	99263417
chr10	99264714	99267153
chr10	99267709	99268120
chr10	99268245	99269140
chr10	99269350	99270778
chr10	99599634	99599954
chr10	99600109	99600557
chr10	99617327	99618788
chr10	99620744	99622208
chr10	101358595	101359012
chr10	105206079	105206851
chr10	105223090	105223390
chr10	105227337	105227595
chr10	105371531	105373094
chr10	105375881	105377101
chr10	105421638	105421919
chr10	106319439	106319745
chr10	108634168	108634942
chr10	111674532	111674815
chr10	111895421	111895723
chr10	112148891	112149590
chr10	112251860	112252120
chr10	112271519	112272647
chr10	112272914	112273166
chr10	112287224	112287574
chr10	114149322	114150320
chr10	114846311	114847956
chr10	114995572	114995923
chr10	114998953	115000357
chr10	115298690	115300196
chr10	118718750	118720899
chr10	120630180	120630601
chr10	120706280	120706847
chr10	121438835	121441582
chr10	124164497	124164789
chr10	124166754	124168205
chr10	124176986	124177316
chr10	125060916	125061485
chr10	125068495	125069393
chr10	125069527	125070193
chr10	127750340	127751953
chr10	129945605	129946006
chr10	134068707	134069106
chr10	134130010	134130447
chr11	6715007	6715296
chr11	8350663	8350965
chr11	8829188	8829439
chr11	9019218	9019617
chr11	9037249	9037838
chr11	9920153	9920484
chr11	9920582	9921841
chr11	10963191	10963459
chr11	12171832	12172078
chr11	12198863	12199330
chr11	13237809	13238456
chr11	13870808	13874806
chr11	14735269	14735784
chr11	17723927	17724584
chr11	27531715	27532127
chr11	34028693	34029034
chr11	35356542	35357461
chr11	35357767	35359895
chr11	35761793	35762047
chr11	36522229	36522631
chr11	37549333	37549951
chr11	37550220	37550543
chr11	37580015	37580436
chr11	44960946	44961249
chr11	46375665	46375911
chr11	46388750	46389054
chr11	47260467	47261132
chr11	47285525	47286372
chr11	47559484	47559733
chr11	47591354	47593409
chr11	47746799	47747123
chr11	47945814	47946161
chr11	57078084	57079462
chr11	57121344	57122883
chr11	57177302	57177680
chr11	57212055	57212698
chr11	57212942	57213315
chr11	58956940	58958264
chr11	58958780	58960117
chr11	58967175	58967558
chr11	58967800	58968584
chr11	60753022	60754377
chr11	61489015	61489495
chr11	61773837	61774121
chr11	63958050	63958612
chr11	63958705	63961680
chr11	63962928	63966921
chr11	63977667	63977932
chr11	63981557	63982636
chr11	65109598	65109936
chr11	65220278	65220751
chr11	67832135	67832413
chr11	68308816	68309525
chr11	68310128	68310379
chr11	68504418	68504695
chr11	68797275	68797576
chr11	68808006	68809181
chr11	69069361	69069614
chr11	69151832	69152133
chr11	69152356	69152721
chr11	69167074	69168334
chr11	69257509	69260788
chr11	69261062	69261511
chr11	69262923	69263399
chr11	69264174	69265012
chr11	72038902	72039174
chr11	73845559	73847169
chr11	74398839	74399168
chr11	76399848	76402461
chr11	76411000	76412380
chr11	76513802	76515031
chr11	76515088	76515362
chr11	85313372	85313620
chr11	86222431	86222706
chr11	86448598	86448844
chr11	89359855	89360120
chr11	89360295	89360629
chr11	93502369	93502888
chr11	94182038	94183371
chr11	94183483	94183815
chr11	95867519	95867826
chr11	95872659	95872976
chr11	95873222	95873606
chr11	102048934	102049197
chr11	102416444	102418596
chr11	102447636	102448009
chr11	102453635	102454295
chr11	102458885	102463837
chr11	102469869	102471661
chr11	102750936	102751314
chr11	102752503	102754490
chr11	106911635	106912008
chr11	108564850	108565280
chr11	109577505	109578865
chr11	109632815	109633328
chr11	109826698	109827015
chr11	109841369	109845896
chr11	110065352	110065692
chr11	110188282	110188985
chr11	110227690	110228771
chr11	110250463	110253379
chr11	110262375	110264096
chr11	110279783	110280042
chr11	111713602	111719166
chr11	111802729	111804016
chr11	111863970	111864384
chr11	111864573	111865116
chr11	111866332	111867554
chr11	111867636	111868236
chr11	111950505	111950795
chr11	112027485	112028193
chr11	113054624	113055410
chr11	113419900	113423559
chr11	113484520	113485019
chr11	113558776	113559156
chr11	113561020	113561435
chr11	113561581	113561975
chr11	115801041	115803270
chr11	117183602	117184039
chr11	118490543	118490937
chr11	119230071	119230525
chr11	119230675	119232232
chr11	121514556	121514803
chr11	121802297	121802775
chr11	121802824	121803274
chr11	122657845	122658259
chr11	123002481	123002855
chr11	123003057	123003356
chr11	123109441	123109860
chr11	123389552	123389871
chr11	124758990	124759980
chr11	124948773	124950204
chr11	127922995	127923300
chr11	128676048	128676545
chr11	128676745	128677221
chr11	128788498	128790091
chr11	128791323	128792081
chr11	129833654	129833900
chr11	129924467	129926494
chr11	130420905	130421438
chr11	130421582	130422113
chr12	556168	556861
chr12	1053376	1053622
chr12	1053668	1053914
chr12	2467320	2468451
chr12	4401971	4403807
chr12	6171802	6172189
chr12	6175254	6175967
chr12	7872901	7873336
chr12	8781847	8782702
chr12	12133924	12134171
chr12	12673013	12673344
chr12	12736147	12736665
chr12	14525739	14527105
chr12	14595383	14595845
chr12	15753858	15755947
chr12	15781161	15782857
chr12	15909992	15910238
chr12	15911053	15911501
chr12	15991638	15992751
chr12	16308266	16308906
chr12	16315971	16317636
chr12	16328431	16328985
chr12	16345886	16346190
chr12	22187308	22188920
chr12	25923698	25925132
chr12	27772031	27772379
chr12	27772579	27772959
chr12	28932634	28933098
chr12	29365486	29366121
chr12	29834707	29834954
chr12	29866494	29866942
chr12	31677449	31677855
chr12	31678012	31678558
chr12	31678880	31679310
chr12	32204180	32204607
chr12	45808630	45810718
chr12	47064200	47064447
chr12	47431872	47432175
chr12	47432417	47432691
chr12	47582757	47583302
chr12	48144456	48144702
chr12	49804300	49804744
chr12	50177863	50178346
chr12	50303257	50303668
chr12	50319850	50320261
chr12	50345813	50346313
chr12	50496207	50496546
chr12	50690458	50690938
chr12	52115805	52116303
chr12	52116551	52116813
chr12	53221479	53224923
chr12	53226656	53226932
chr12	53227076	53227455
chr12	53229037	53232969
chr12	53241292	53241565
chr12	53253601	53254394
chr12	53254502	53254982
chr12	53261002	53261562
chr12	54820868	54821447
chr12	57489323	57489822
chr12	57490244	57490840
chr12	57673271	57674024
chr12	62642792	62643201
chr12	63041034	63041373
chr12	63041697	63042069
chr12	63241553	63242948
chr12	63803540	63805213
chr12	64646695	64647030
chr12	64894529	64895304
chr12	64895471	64896032
chr12	66261479	66262236
chr12	66440737	66441749
chr12	67747880	67748196
chr12	67748469	67749098
chr12	67752250	67752617
chr12	67828980	67829550
chr12	68065869	68066407
chr12	68159854	68160179
chr12	68953372	68954793
chr12	69220612	69221979
chr12	69361551	69362513
chr12	72143186	72143526
chr12	76034572	76034971
chr12	76035063	76035890
chr12	76036274	76036803
chr12	76183420	76184974
chr12	77005060	77005569
chr12	77005694	77006209
chr12	89519926	89520583
chr12	89658259	89658714
chr12	89769401	89770238
chr12	89783089	89785816
chr12	89799977	89800304
chr12	90610295	90610684
chr12	90610958	90611204
chr12	92329417	92329667
chr12	92942117	92942404
chr12	93842035	93842300
chr12	94166392	94166770
chr12	94508213	94510714
chr12	95099868	95100171
chr12	102186539	102188188
chr12	102248740	102255174
chr12	104612830	104613983
chr12	104640961	104642581
chr12	104977294	104977677
chr12	105007470	105007751
chr12	106229093	106229373
chr12	106229992	106230281
chr12	109006964	109008005
chr12	109550708	109551104
chr12	110498228	110498616
chr12	110836574	110836820
chr12	110927320	110927874
chr12	111588509	111588755
chr12	111659162	111660463
chr12	111660628	111661080
chr12	112302363	112302902
chr12	112308175	112309127
chr12	117559541	117559892
chr12	121037035	121037442
chr12	122221788	122222367
chr12	124928873	124929234
chr12	125414970	125415271
chr12	127715767	127716150
chr12	131331248	131331788
chr12	131331987	131332412
chr12	131994498	131994786
chr12	131995323	131995957
chr13	20911795	20912093
chr13	20912318	20912828
chr13	20913048	20915454
chr13	20927974	20928313
chr13	24014881	24015397
chr13	24760796	24761271
chr13	27253235	27254120
chr13	27766841	27767210
chr13	27836376	27837291
chr13	28626917	28627265
chr13	28903522	28903957
chr13	28904207	28904549
chr13	28930170	28933816
chr13	28947739	28948150
chr13	28975272	28976598
chr13	29040840	29042228
chr13	29097879	29098320
chr13	29155885	29158081
chr13	29158986	29160304
chr13	29160975	29161568
chr13	29161758	29162742
chr13	30375739	30376097
chr13	30671705	30671951
chr13	30962553	30963176
chr13	31362495	31362979
chr13	36070431	36070883
chr13	36884138	36885417
chr13	36907314	36907854
chr13	37638440	37638925
chr13	40723404	40723846
chr13	40723955	40724323
chr13	42219215	42219496
chr13	42219595	42220068
chr13	42229143	42229623
chr13	42401489	42402615
chr13	42416045	42417072
chr13	42423548	42426426
chr13	42490415	42490860
chr13	42543657	42545072
chr13	43393652	43393966
chr13	43406281	43406539
chr13	44623450	44624612
chr13	44702077	44702787
chr13	44703026	44703746
chr13	44710210	44711498
chr13	44837640	44839490
chr13	45375753	45377196
chr13	45629456	45629716
chr13	45629967	45630804
chr13	46269458	46270193
chr13	47148451	47151179
chr13	47174979	47175570
chr13	47538166	47538678
chr13	47640046	47640299
chr13	48688132	48688522
chr13	49660643	49660936
chr13	49661189	49661549
chr13	49888479	49888728
chr13	50798480	50798726
chr13	51815420	51815996
chr13	51816108	51816600
chr13	73397402	73397920
chr13	78574098	78574481
chr13	79765251	79766317
chr13	80517345	80518571
chr13	80683193	80683663
chr13	80704740	80708439
chr13	80777319	80777841
chr13	80777923	80778268
chr13	80809453	80810055
chr13	90573348	90573650
chr13	96375649	96375935
chr13	99234575	99234858
chr13	101158763	101159411
chr13	111934297	111935215
chr14	21018821	21019938
chr14	21023923	21024180
chr14	21024309	21024831
chr14	21487328	21487696
chr14	23158825	23159269
chr14	23722074	23722831
chr14	31516108	31516457
chr14	31516686	31517005
chr14	31635318	31635710
chr14	31733206	31733463
chr14	32406673	32406995
chr14	32407201	32407581
chr14	32938379	32938762
chr14	32940644	32940988
chr14	33070758	33071184
chr14	33071376	33071848
chr14	34781458	34781739
chr14	35624628	35626212
chr14	42789435	42789773
chr14	47042778	47045198
chr14	47064504	47064859
chr14	47065660	47066257
chr14	50987318	50988263
chr14	51472217	51473784
chr14	51473893	51474355
chr14	51634356	51634626
chr14	51634781	51635256
chr14	59628386	59629330
chr14	60326675	60327129
chr14	60330072	60331625
chr14	61469812	61471013
chr14	61517032	61518729
chr14	64219853	64220167
chr14	64883223	64883862
chr14	64884060	64885110
chr14	68698837	68699434
chr14	68699562	68699992
chr14	69360856	69362529
chr14	69363223	69365508
chr14	69366767	69367482
chr14	69890762	69891011
chr14	70071994	70072567
chr14	74093581	74094266
chr14	74309838	74310182
chr14	74941267	74941639
chr14	75399130	75399812
chr14	75400548	75401650
chr14	75401744	75402087
chr14	75403181	75404432
chr14	75491992	75492709
chr14	75672222	75672517
chr14	77426445	77426840
chr14	78280225	78280472
chr14	81951816	81952962
chr14	85919843	85920571
chr14	85925683	85927001
chr14	85929376	85929996
chr14	86041910	86042183
chr14	86042800	86044497
chr14	86044646	86049597
chr14	86050515	86050993
chr14	89467106	89467643
chr14	89665007	89665417
chr14	89665515	89665828
chr14	89670027	89670273
chr14	90545781	90546291
chr14	90552399	90553921
chr14	90554010	90555269
chr14	91332953	91333859
chr14	91798765	91799043
chr14	91810216	91810523
chr14	93326299	93327282
chr14	93327905	93330092
chr14	93354984	93355379
chr14	93355591	93355878
chr14	93658819	93659559
chr14	94486898	94487384
chr14	94487555	94488948
chr14	94489001	94489250
chr14	94495430	94495795
chr14	94808246	94808764
chr14	100547750	100548449
chr14	102200378	102200686
chr14	103540919	103542203
chr14	104268162	104268705
chr15	22985589	22986240
chr15	28392623	28393078
chr15	28393234	28393850
chr15	31470551	31471047
chr15	32977865	32978502
chr15	33110921	33111176
chr15	33111317	33112480
chr15	33123956	33124210
chr15	33135218	33136560
chr15	33138075	33138321
chr15	33141592	33142519
chr15	33142617	33145123
chr15	33153449	33154348
chr15	33169771	33174411
chr15	33174887	33175235
chr15	34942735	34943049
chr15	35734670	35735096
chr15	38296939	38297396
chr15	38320576	38321270
chr15	38321392	38322039
chr15	38347077	38347342
chr15	38373310	38373874
chr15	38418341	38418878
chr15	38426055	38426571
chr15	38586602	38586921
chr15	38599803	38600081
chr15	38916648	38917238
chr15	38966538	38966845
chr15	38966977	38967417
chr15	40585777	40586065
chr15	40687343	40687898
chr15	41921391	41922609
chr15	43277037	43277325
chr15	45717549	45717886
chr15	45948391	45948664
chr15	47714858	47715247
chr15	49367969	49368234
chr15	49441281	49441600
chr15	51494413	51495085
chr15	51495258	51495755
chr15	51536312	51536779
chr15	51537053	51537403
chr15	51544765	51546282
chr15	52519869	52520306
chr15	53007487	53007847
chr15	55920187	55920755
chr15	55923161	55923652
chr15	58459061	58460115
chr15	58601945	58602219
chr15	58678994	58679866
chr15	58843437	58844936
chr15	59475581	59475828
chr15	59524004	59525662
chr15	59527832	59528519
chr15	59642020	59642356
chr15	64616355	64616783
chr15	64617024	64617616
chr15	67097569	67098570
chr15	67110856	67114019
chr15	67122360	67123282
chr15	67334909	67335411
chr15	68314627	68314949
chr15	68563828	68565020
chr15	68604193	68606363
chr15	69596030	69598672
chr15	69608195	69609226
chr15	69613542	69613858
chr15	69615282	69615842
chr15	70437622	70438106
chr15	70438225	70438513
chr15	70442401	70442647
chr15	70449034	70450425
chr15	70655226	70656585
chr15	72556425	72558268
chr15	72650494	72651158
chr15	72651328	72652096
chr15	72652236	72652644
chr15	73862783	73863127
chr15	73863321	73863625
chr15	74714709	74715721
chr15	74715932	74716235
chr15	76376302	76376743
chr15	76376906	76377264
chr15	77355508	77357719
chr15	77358096	77358739
chr15	80234273	80235166
chr15	80235249	80237042
chr15	80239329	80240064
chr15	80250983	80251256
chr15	80278783	80279393
chr15	81081361	81081709
chr15	81081829	81082209
chr15	81546957	81547203
chr15	82496587	82496966
chr15	83685009	83688121
chr15	83782262	83783179
chr15	83783392	83783795
chr15	85191024	85193227
chr15	85227642	85227978
chr15	85358493	85358759
chr15	85376902	85377169
chr15	85377249	85378223
chr15	85378449	85381513
chr15	85383588	85384196
chr15	85384324	85384830
chr15	85556099	85556521
chr15	86237634	86238057
chr15	91096965	91097437
chr15	99329783	99330627
chr15	99330788	99331392
chr15	99331721	99332625
chr15	99937320	99944999
chr15	99954590	99955121
chr15	99955183	99956852
chr15	99982113	99982818
chr15	100006632	100006945
chr15	100007149	100007617
chr15	101182631	101182907
chr15	101805559	101805923
chr15	101986044	101986410
chr16	2849179	2850410
chr16	2915484	2916372
chr16	3872600	3873124
chr16	9102209	9102539
chr16	11015896	11016245
chr16	11062147	11062456
chr16	11062533	11063627
chr16	11472953	11473393
chr16	11473485	11473966
chr16	11588900	11589303
chr16	11820624	11823290
chr16	11828100	11828564
chr16	12567826	12568797
chr16	12569059	12569489
chr16	14017889	14018748
chr16	14044553	14045003
chr16	14093961	14094276
chr16	14214690	14215780
chr16	15497685	15498835
chr16	15583079	15583390
chr16	15584914	15585410
chr16	15585592	15585903
chr16	15691121	15691387
chr16	15698467	15698861
chr16	15710154	15710802
chr16	16070387	16071716
chr16	16163124	16163412
chr16	18886946	18888716
chr16	19187088	19187415
chr16	19191486	19191758
chr16	20908308	20908670
chr16	21570948	21571220
chr16	22855045	22855378
chr16	23859591	23860477
chr16	23932099	23932538
chr16	24273985	24274231
chr16	24274402	24274990
chr16	24285099	24285345
chr16	27657699	27658069
chr16	29020360	29020673
chr16	29157250	29157535
chr16	29283746	29284323
chr16	29746435	29746782
chr16	29747701	29748239
chr16	29748299	29748649
chr16	29914733	29915105
chr16	29920093	29921472
chr16	31017020	31017867
chr16	31253854	31254130
chr16	48354652	48356252
chr16	48357570	48358532
chr16	53113886	53114155
chr16	56511279	56511711
chr16	57358424	57358935
chr16	57372721	57375956
chr16	57376511	57378649
chr16	57438745	57439083
chr16	57439348	57439673
chr16	57441041	57441401
chr16	57442834	57443832
chr16	58399633	58400415
chr16	58400485	58401274
chr16	67089744	67090494
chr16	68165544	68167929
chr16	68176547	68176887
chr16	68745239	68745512
chr16	69200388	69200728
chr16	69882745	69883127
chr16	70554488	70554812
chr16	72243829	72246269
chr16	74776229	74776645
chr16	75278365	75279554
chr16	75338553	75341019
chr16	75350495	75351834
chr16	75395501	75395832
chr16	75416174	75417169
chr16	75419152	75419473
chr16	79009735	79010172
chr16	79035296	79036118
chr16	79161458	79161841
chr16	79349698	79350125
chr16	81800940	81801242
chr16	85732824	85733268
chr16	85733617	85733877
chr16	88912203	88913001
chr16	89871920	89872169
chr16	89873777	89876012
chr17	505265	506428
chr17	510312	511820
chr17	2685768	2686128
chr17	3534302	3534708
chr17	4110339	4111639
chr17	4222075	4222505
chr17	5208238	5208598
chr17	9264343	9264684
chr17	9264833	9265148
chr17	9778502	9779730
chr17	9781244	9785239
chr17	13977242	13977611
chr17	16276362	16277604
chr17	16418974	16420076
chr17	16420142	16420982
chr17	17157616	17158067
chr17	17840988	17841494
chr17	19575103	19575349
chr17	19575437	19575962
chr17	20109559	20110189
chr17	21069464	21071502
chr17	27538936	27540733
chr17	27739327	27741317
chr17	27967285	27969689
chr17	27972091	27973600
chr17	29172614	29172864
chr17	29913820	29914182
chr17	33407310	33407903
chr17	34384891	34386156
chr17	35342504	35342773
chr17	36834238	36834813
chr17	37066253	37066563
chr17	40661468	40662017
chr17	40678251	40678520
chr17	41533800	41534282
chr17	41545212	41545481
chr17	41545708	41546966
chr17	43523636	43523929
chr17	45334538	45335525
chr17	45835189	45835486
chr17	47002826	47003178
chr17	47414948	47415249
chr17	47435849	47436324
chr17	48104148	48106381
chr17	48138740	48138986
chr17	48139415	48143281
chr17	48906096	48906361
chr17	48906580	48907256
chr17	48975592	48976464
chr17	48995378	48997255
chr17	53512409	53512728
chr17	53623460	53623941
chr17	53624091	53625504
chr17	53661173	53662338
chr17	53740532	53740925
chr17	53743873	53745034
chr17	54382719	54382994
chr17	55712217	55712550
chr17	56584125	56584371
chr17	56644768	56647779
chr17	56683156	56683460
chr17	56692419	56693377
chr17	56693605	56693876
chr17	57033965	57035097
chr17	57046056	57046328
chr17	57046848	57049885
chr17	57051387	57052802
chr17	57063097	57063344
chr17	57103107	57104043
chr17	57503227	57503504
chr17	57504503	57506026
chr17	58218918	58219426
chr17	58570955	58571432
chr17	60529286	60529639
chr17	60529834	60530207
chr17	61326987	61327233
chr17	62314916	62315984
chr17	62316165	62316415
chr17	64629656	64630127
chr17	64651688	64652059
chr17	64652262	64652791
chr17	64663053	64663429
chr17	64685565	64685885
chr17	65100377	65101419
chr17	66085815	66086077
chr17	66218254	66218653
chr17	66223903	66224274
chr17	66224506	66225722
chr17	68036199	68036750
chr17	68534803	68535929
chr17	70988478	70989115
chr17	70989298	70989836
chr17	71095612	71095972
chr17	73751798	73752247
chr17	74530808	74531054
chr17	75153023	75154964
chr17	76223200	76224460
chr17	76238697	76239142
chr17	76492114	76492510
chr17	78578062	78578455
chr17	78855223	78855591
chr17	80665347	80666653
chr18	2776358	2777341
chr18	2777454	2777789
chr18	3478304	3478619
chr18	8526662	8526983
chr18	8942832	8943346
chr18	8943398	8944434
chr18	9022395	9023513
chr18	9049420	9049814
chr18	9354476	9354810
chr18	9484437	9485671
chr18	9898822	9899097
chr18	9899323	9899569
chr18	10260693	10262251
chr18	10304571	10304986
chr18	10305119	10305469
chr18	10318789	10319489
chr18	10320466	10320969
chr18	11785090	11785447
chr18	12644802	12646360
chr18	13469929	13472578
chr18	13592032	13592988
chr18	13594142	13594507
chr18	13594689	13595500
chr18	13614268	13616063
chr18	13623206	13624181
chr18	18584451	18584818
chr18	18761468	18761802
chr18	18761975	18762561
chr18	21142913	21144746
chr18	21296304	21296690
chr18	21296780	21297065
chr18	21319776	21320137
chr18	21320322	21320829
chr18	21405734	21406864
chr18	21557865	21558635
chr18	21607050	21607308
chr18	32290208	32290619
chr18	32290663	32290989
chr18	32989726	32990022
chr18	39518035	39518460
chr18	39518664	39518922
chr18	42871931	42872304
chr18	43369169	43369541
chr18	43372606	43374054
chr18	43382480	43384151
chr18	43385398	43385649
chr18	43385757	43387240
chr18	45315281	45315657
chr18	46183709	46184093
chr18	46184150	46184475
chr18	46199478	46200973
chr18	46328068	46328475
chr18	48499296	48500305
chr18	53545797	53546178
chr18	59925628	59927169
chr18	59951576	59953485
chr18	60277046	60277773
chr18	60277883	60281175
chr18	63661087	63661636
chr18	65027558	65028298
chr18	71805894	71808218
chr18	72658763	72659276
chr18	73076250	73076623
chr18	74398469	74399331
chr18	76876958	76878391
chr18	76897061	76897542
chr18	76930478	76930724
chr18	77284194	77284548
chr18	77715000	77715440
chr19	2173563	2173875
chr19	3451233	3451892
chr19	3549698	3550489
chr19	3562842	3564805
chr19	3565349	3565595
chr19	3579018	3581072
chr19	4420734	4421014
chr19	4504585	4504989
chr19	4505217	4505514
chr19	4654079	4654698
chr19	4654959	4655408
chr19	5907483	5908214
chr19	6638673	6639579
chr19	6639733	6640285
chr19	6641387	6642000
chr19	6659762	6660359
chr19	6662560	6665641
chr19	6665992	6666472
chr19	6678141	6680343
chr19	6866664	6867013
chr19	6959055	6959448
chr19	8016480	8016957
chr19	8017607	8018051
chr19	8612566	8612906
chr19	10243403	10243664
chr19	10754957	10755531
chr19	10758645	10759083
chr19	10759233	10759687
chr19	10963920	10964194
chr19	10965038	10965290
chr19	11396996	11397866
chr19	13292463	13293195
chr19	14382899	14383275
chr19	14385907	14386153
chr19	15469993	15470476
chr19	19640986	19641384
chr19	19704502	19705402
chr19	19705493	19706826
chr19	21211579	21212174
chr19	30333827	30334879
chr19	35813323	35813979
chr19	36532319	36533360
chr19	39042307	39042596
chr19	39047755	39048199
chr19	40443965	40444228
chr19	40446978	40447858
chr19	45401270	45401559
chr19	47077257	47077879
chr19	49178457	49178967
chr19	49432584	49432849
chr19	51424548	51425116
chr19	51425263	51425653
chr19	52702911	52703400
chr19	52703597	52704134
chr19	55166645	55167392
chr19	55484857	55485906
chr19	55609110	55610231
chr19	56645479	56645960
chr2	4181947	4182964
chr2	8345110	8345535
chr2	8436067	8436553
chr2	8651871	8652334
chr2	8660411	8661790
chr2	9374362	9374833
chr2	9554588	9557425
chr2	9663896	9664535
chr2	9734101	9735023
chr2	9906083	9906943
chr2	10524502	10524942
chr2	11029967	11030255
chr2	11040719	11041393
chr2	11326934	11328542
chr2	11335988	11336823
chr2	11410583	11410949
chr2	11411266	11411820
chr2	11420731	11421287
chr2	12835808	12836066
chr2	17092561	17093111
chr2	20526837	20527497
chr2	20854290	20854559
chr2	21490978	21492694
chr2	24024594	24024975
chr2	24491474	24492855
chr2	24499060	24499356
chr2	25346365	25346746
chr2	25522144	25522433
chr2	25527373	25530439
chr2	25784346	25784790
chr2	27226922	27227418
chr2	27407943	27408813
chr2	27408883	27409466
chr2	27425520	27425801
chr2	27426048	27426653
chr2	27493331	27493635
chr2	27653933	27655483
chr2	28124390	28124735
chr2	28800036	28801556
chr2	29241208	29241542
chr2	29328747	29329282
chr2	29329340	29330192
chr2	29330594	29331131
chr2	31519690	31520757
chr2	31520901	31521818
chr2	32627411	32628175
chr2	36286400	36287450
chr2	37733849	37734219
chr2	37847198	37847462
chr2	37984467	37986142
chr2	38266530	38266912
chr2	38947168	38948991
chr2	39600074	39600341
chr2	39656310	39657021
chr2	39657218	39657701
chr2	39696217	39697061
chr2	39705605	39707219
chr2	39708245	39710257
chr2	39710414	39711891
chr2	39722456	39722805
chr2	39737098	39737349
chr2	40600019	40600297
chr2	40658251	40658719
chr2	40852368	40853849
chr2	42407907	42408159
chr2	42504053	42504546
chr2	42504809	42505091
chr2	42505150	42505400
chr2	42984504	42985852
chr2	43022491	43022903
chr2	44324834	44325415
chr2	44330181	44330427
chr2	44330667	44331187
chr2	44390988	44391287
chr2	45361362	45362040
chr2	46605737	46607479
chr2	46864168	46864415
chr2	46871752	46872309
chr2	46872393	46874019
chr2	51737763	51738228
chr2	54921114	54921794
chr2	55349079	55349345
chr2	55537793	55538693
chr2	55538890	55540048
chr2	57643381	57645317
chr2	57656044	57658205
chr2	57687222	57688887
chr2	61033657	61035056
chr2	61099427	61099815
chr2	61099995	61100296
chr2	61392708	61394083
chr2	61398123	61398581
chr2	61399376	61401410
chr2	61986296	61987501
chr2	64212200	64212765
chr2	64610145	64610446
chr2	64617392	64619776
chr2	64620856	64622163
chr2	64732382	64732666
chr2	65052682	65053442
chr2	65205426	65205761
chr2	65289734	65290065
chr2	65387200	65387471
chr2	65777647	65777898
chr2	65781587	65781970
chr2	65782213	65783255
chr2	65794036	65794517
chr2	68379243	68380913
chr2	74974015	74974813
chr2	75004484	75004730
chr2	79035550	79035838
chr2	81873136	81873518
chr2	85713178	85713764
chr2	86070904	86071735
chr2	86071919	86072311
chr2	86110005	86110316
chr2	86349893	86350590
chr2	86350663	86351248
chr2	91957319	91957573
chr2	96727087	96727656
chr2	96727735	96728735
chr2	96729092	96729650
chr2	96748316	96748619
chr2	96748746	96749246
chr2	96769350	96769742
chr2	96770088	96770509
chr2	96784582	96785882
chr2	96786127	96786767
chr2	97005730	97006201
chr2	97006376	97007346
chr2	97467775	97468041
chr2	101349818	101350326
chr2	101451610	101452020
chr2	101470168	101471341
chr2	101482132	101482687
chr2	101482837	101483324
chr2	101725566	101725910
chr2	102012112	102012968
chr2	106484759	106485179
chr2	106490034	106490320
chr2	109189168	109189555
chr2	109189656	109190135
chr2	111966807	111967093
chr2	111967921	111968171
chr2	113470443	113470914
chr2	113471057	113471596
chr2	113698620	113699170
chr2	113813500	113814239
chr2	113814337	113815658
chr2	113816902	113817232
chr2	113817573	113818001
chr2	113818211	113818766
chr2	113834179	113835044
chr2	113835188	113836027
chr2	113836252	113837894
chr2	113846274	113846533
chr2	113851404	113851722
chr2	113861112	113864276
chr2	113888444	113889838
chr2	113890812	113891639
chr2	114018690	114019174
chr2	118934899	118935566
chr2	120119203	120120284
chr2	124392397	124393536
chr2	124503347	124503707
chr2	127477301	127477726
chr2	128915249	128915943
chr2	128916055	128916633
chr2	128953740	128954453
chr2	131132702	131133089
chr2	132398155	132399730
chr2	133561933	133562350
chr2	134909555	134911912
chr2	135218731	135219065
chr2	138792811	138794206
chr2	143614543	143617934
chr2	143617999	143618255
chr2	144208990	144209312
chr2	145112989	145114843
chr2	145135811	145136139
chr2	151320608	151320872
chr2	152133230	152133640
chr2	152133969	152134265
chr2	152136989	152137354
chr2	152331904	152332189
chr2	152861038	152861423
chr2	153301890	153303888
chr2	153329011	153329511
chr2	158682042	158682478
chr2	158682545	158683112
chr2	161065904	161066211
chr2	161124436	161124869
chr2	161124982	161125534
chr2	161149051	161149545
chr2	161155461	161156221
chr2	161156358	161156854
chr2	161158272	161158834
chr2	161171618	161172662
chr2	164254166	164254442
chr2	166744855	166746233
chr2	170695164	170695492
chr2	173239751	173240183
chr2	173380683	173381149
chr2	173558080	173559357
chr2	174388195	174390070
chr2	174410506	174410773
chr2	175229492	175230401
chr2	175230537	175231068
chr2	182675246	182676393
chr2	190719919	190720384
chr2	191655896	191656434
chr2	192464602	192467034
chr2	192471673	192471922
chr2	192472110	192472458
chr2	192499349	192500429
chr2	192991970	192992315
chr2	195898019	195898358
chr2	196373664	196375052
chr2	198113053	198113351
chr2	198113507	198114470
chr2	198994217	198994474
chr2	200682593	200683460
chr2	200842964	200843443
chr2	201612801	201613156
chr2	201613256	201613589
chr2	201613761	201614581
chr2	201949190	201950544
chr2	202284656	202285203
chr2	202285460	202285897
chr2	204538874	204539236
chr2	204648526	204648843
chr2	204666409	204667237
chr2	204668304	204670578
chr2	204671207	204671557
chr2	205113863	205114256
chr2	208193338	208196454
chr2	208202054	208203942
chr2	209179334	209180630
chr2	210360456	210360834
chr2	213773134	213773557
chr2	213773732	213774113
chr2	213776905	213777312
chr2	213823975	213824426
chr2	213839780	213840078
chr2	216357711	216359129
chr2	216369635	216370754
chr2	216462912	216463158
chr2	216469140	216469482
chr2	216469598	216470015
chr2	216607059	216608673
chr2	216629006	216629877
chr2	216637469	216639801
chr2	216834785	216835230
chr2	216835359	216835605
chr2	216838430	216839431
chr2	216845865	216846300
chr2	216859447	216859760
chr2	216863312	216864290
chr2	216866076	216866441
chr2	216866545	216867741
chr2	216874759	216875064
chr2	216882393	216883059
chr2	217341911	217343748
chr2	218278301	218278583
chr2	218517463	218518056
chr2	218518143	218518832
chr2	218719510	218719801
chr2	218720080	218720358
chr2	218730162	218730623
chr2	218868260	218868797
chr2	219654466	219655127
chr2	219964351	219965215
chr2	220262410	220262662
chr2	223473770	223474139
chr2	223857182	223857665
chr2	224779223	224780724
chr2	224803886	224804308
chr2	226943782	226944375
chr2	226944746	226945125
chr2	228767885	228768207
chr2	228768499	228768822
chr2	237666416	237667784
chr2	237676243	237676605
chr2	238036572	238037547
chr2	238343930	238344273
chr2	238661148	238661496
chr2	239338717	239339048
chr2	239552284	239554039
chr2	240527355	240527696
chr2	240528052	240528390
chr2	240743582	240744160
chr2	240744429	240744973
chr2	240753249	240753623
chr2	240753919	240754322
chr2	242580793	242581086
chr2	242581218	242582046
chr20	2864423	2865648
chr20	2865846	2867230
chr20	2867309	2870055
chr20	2928326	2928700
chr20	3905315	3905643
chr20	4032666	4033212
chr20	4033398	4033876
chr20	4040368	4042448
chr20	5196599	5196875
chr20	9333645	9333893
chr20	10663909	10664210
chr20	13491809	13492079
chr20	13849145	13849905
chr20	20308022	20308290
chr20	20436952	20437435
chr20	21341144	21342154
chr20	21342307	21342739
chr20	22983563	22983888
chr20	22984120	22984593
chr20	24703306	24704404
chr20	24875859	24876143
chr20	25522527	25522968
chr20	30293603	30295144
chr20	30921618	30922821
chr20	33060052	33061146
chr20	33526000	33526275
chr20	33698630	33699747
chr20	33723362	33724459
chr20	33934435	33934969
chr20	33935187	33935471
chr20	33947677	33948800
chr20	34591681	34592003
chr20	34592185	34592697
chr20	34715742	34717719
chr20	36308344	36308918
chr20	36665098	36665446
chr20	36737743	36738278
chr20	36738574	36738934
chr20	36769827	36770904
chr20	36819791	36820049
chr20	36894533	36896718
chr20	36915813	36917048
chr20	39686201	39687199
chr20	39687340	39687836
chr20	39950069	39950315
chr20	43716012	43716780
chr20	44081282	44082101
chr20	44087941	44088406
chr20	44123664	44123995
chr20	44239990	44240414
chr20	44402710	44403289
chr20	45000625	45000934
chr20	45004147	45005263
chr20	45005336	45005638
chr20	45185818	45187168
chr20	45689975	45690342
chr20	45873598	45873940
chr20	45885527	45888639
chr20	45922066	45922546
chr20	46008284	46008601
chr20	46009071	46009548
chr20	46011396	46012136
chr20	48273324	48274141
chr20	48274334	48274850
chr20	48814719	48815270
chr20	48863639	48867084
chr20	48867247	48870445
chr20	48871928	48872198
chr20	49182620	49185011
chr20	49188393	49191233
chr20	49341100	49341433
chr20	49341683	49342115
chr20	49540854	49541111
chr20	49596336	49596780
chr20	50263859	50264138
chr20	50359315	50359696
chr20	50365873	50367462
chr20	50733999	50735063
chr20	52309106	52309430
chr20	55008169	55009115
chr20	58672524	58673295
chr20	61076375	61078078
chr20	61206466	61206721
chr21	16115505	16116397
chr21	16116632	16116916
chr21	18774989	18775250
chr21	26873972	26874285
chr21	30541159	30541896
chr21	32592255	32592525
chr21	32632951	32633237
chr21	32657136	32657450
chr21	32658495	32659151
chr21	32659210	32659986
chr21	32661823	32662183
chr21	32665793	32667199
chr21	35448837	35449126
chr21	35653857	35655524
chr21	35910360	35910829
chr21	36361812	36362204
chr21	36362426	36363001
chr21	36363266	36363927
chr21	36364186	36364586
chr21	36364894	36365328
chr21	36366722	36370110
chr21	36652346	36652639
chr21	36771423	36771728
chr21	36842476	36842881
chr21	37557682	37557928
chr21	37575336	37575884
chr21	40330717	40331116
chr21	40769431	40770238
chr21	43071914	43072181
chr21	43422290	43422690
chr21	44933268	44933536
chr21	45008721	45009062
chr21	45011083	45011694
chr21	47480258	47480504
chr21	47924266	47924573
chr21	47924893	47925239
chr22	17350389	17350659
chr22	17350750	17351265
chr22	17382819	17383256
chr22	20885694	20886364
chr22	21135289	21135900
chr22	22616453	22617211
chr22	22624440	22624691
chr22	24439575	24440112
chr22	24440166	24440483
chr22	24440683	24441385
chr22	29065906	29066261
chr22	29066413	29066771
chr22	30418635	30419897
chr22	30427637	30428726
chr22	30428774	30429131
chr22	30429293	30429976
chr22	30430182	30430530
chr22	30797830	30798891
chr22	31112845	31113348
chr22	31113498	31114019
chr22	31138812	31139202
chr22	31600549	31601055
chr22	31981133	31981479
chr22	31981569	31982947
chr22	32010904	32013143
chr22	32533623	32534676
chr22	32620211	32620888
chr22	33087409	33088666
chr22	33088757	33089065
chr22	33124502	33125511
chr22	33125646	33126497
chr22	33129003	33133179
chr22	33138444	33143348
chr22	33143464	33144449
chr22	33144782	33145076
chr22	33148138	33148786
chr22	33148919	33149203
chr22	33149508	33149886
chr22	35812904	35813357
chr22	37361865	37362456
chr22	37362646	37363987
chr22	37630522	37631377
chr22	37631422	37633138
chr22	37633221	37634303
chr22	37937655	37938584
chr22	38602795	38603142
chr22	38603624	38606444
chr22	39159960	39160224
chr22	39178703	39179108
chr22	39184536	39185029
chr22	40820801	40822090
chr22	41160394	41161365
chr22	41258714	41259000
chr22	41874693	41875066
chr22	43192816	43193063
chr22	43193255	43193626
chr22	43395504	43401901
chr22	43413687	43414646
chr22	45076921	45077253
chr22	45077488	45078006
chr22	45594088	45594485
chr22	45596934	45601677
chr22	45601868	45602148
chr22	45725340	45725622
chr22	47144724	47147526
chr22	47274738	47275082
chr22	50414644	50415578
chr22	50891367	50891784
chr3	4352920	4353502
chr3	5063126	5063526
chr3	5063701	5064043
chr3	11390970	11393122
chr3	11417434	11418089
chr3	11430891	11431424
chr3	11431603	11432176
chr3	12185536	12186131
chr3	12348674	12351444
chr3	12359195	12361428
chr3	12362355	12362655
chr3	12405141	12405438
chr3	12933088	12933402
chr3	13066126	13067219
chr3	14179396	14179685
chr3	14195220	14197253
chr3	14208270	14209472
chr3	14210552	14212047
chr3	14505218	14506263
chr3	14847209	14847639
chr3	14847852	14848192
chr3	15317812	15318242
chr3	15347231	15347612
chr3	15355927	15357331
chr3	15558896	15559312
chr3	16298379	16300171
chr3	16452757	16453106
chr3	16469167	16469427
chr3	16480476	16481344
chr3	16580363	16580743
chr3	17231109	17233299
chr3	18594527	18594828
chr3	18701879	18702199
chr3	22164422	22164759
chr3	22402619	22403210
chr3	22403325	22403779
chr3	22405741	22406972
chr3	22409589	22410304
chr3	23224753	23225149
chr3	24548589	24549953
chr3	24719636	24719926
chr3	30754716	30755010
chr3	32534676	32535772
chr3	32538067	32538422
chr3	33837067	33837424
chr3	33953097	33953364
chr3	36817428	36818840
chr3	37847843	37848375
chr3	37854911	37855605
chr3	37964280	37964965
chr3	42725096	42725353
chr3	43798808	43799240
chr3	43799425	43800812
chr3	43801278	43801607
chr3	43811902	43812221
chr3	44269077	44269351
chr3	44269409	44269995
chr3	44995568	44995814
chr3	45119935	45120311
chr3	45299333	45301150
chr3	45567676	45567985
chr3	45569778	45570698
chr3	46454275	46456154
chr3	48285249	48286045
chr3	48568450	48568709
chr3	48914926	48915217
chr3	49297957	49299108
chr3	49351210	49351504
chr3	49351671	49351958
chr3	49557162	49557493
chr3	50673568	50673878
chr3	50676713	50677097
chr3	52165110	52165409
chr3	52238415	52238772
chr3	52471101	52471394
chr3	57003677	57005629
chr3	57058981	57059279
chr3	57059521	57059939
chr3	57938311	57938608
chr3	58067900	58068198
chr3	58437381	58437627
chr3	58511382	58511659
chr3	59374539	59374805
chr3	60061908	60062184
chr3	62173962	62174253
chr3	67340554	67342906
chr3	69559044	69560234
chr3	69570094	69571356
chr3	69587189	69587547
chr3	69587755	69588383
chr3	69596082	69597569
chr3	69905795	69906715
chr3	72033460	72034922
chr3	72053751	72054159
chr3	72054442	72054914
chr3	72081839	72084185
chr3	72084498	72084888
chr3	81792410	81793105
chr3	88063003	88063439
chr3	90056787	90057869
chr3	98528214	98529131
chr3	99226412	99227845
chr3	101749777	101750135
chr3	101908079	101908496
chr3	101908684	101909070
chr3	104961734	104962045
chr3	105046265	105046990
chr3	105047081	105047518
chr3	105483686	105484044
chr3	105595064	105596955
chr3	105618793	105619044
chr3	107634213	107635510
chr3	107646495	107647130
chr3	107663235	107663673
chr3	107669535	107670159
chr3	107756221	107756703
chr3	111479730	111480166
chr3	111481306	111481666
chr3	111965636	111966196
chr3	113488141	113488996
chr3	113493494	113495355
chr3	114427433	114428528
chr3	119118405	119120185
chr3	120363680	120363935
chr3	121821222	121821816
chr3	122069569	122069833
chr3	122093750	122094074
chr3	122094263	122094604
chr3	122096662	122096970
chr3	122097110	122097607
chr3	122097884	122098630
chr3	122299134	122299380
chr3	122464065	122464361
chr3	122575616	122576019
chr3	122608642	122609009
chr3	123405239	123405806
chr3	123407405	123408141
chr3	123410769	123411114
chr3	123981725	123982097
chr3	123991958	123992413
chr3	124563990	124565107
chr3	124565511	124566716
chr3	124574902	124580324
chr3	124826562	124826994
chr3	125362892	125363284
chr3	126326285	126326896
chr3	126339168	126339645
chr3	127292232	127292757
chr3	127293027	127293383
chr3	128971993	128972297
chr3	129150744	129151037
chr3	133145335	133145587
chr3	133326314	133326771
chr3	133326916	133327668
chr3	133956571	133956958
chr3	133958061	133958451
chr3	133958565	133958951
chr3	138108581	138109695
chr3	138109773	138110268
chr3	138318974	138324744
chr3	138471506	138471996
chr3	140435199	140435562
chr3	141050146	141050586
chr3	143102482	143102764
chr3	144527608	144529549
chr3	144571472	144571909
chr3	144572139	144572573
chr3	144585059	144585526
chr3	144585594	144585867
chr3	148361107	148361384
chr3	148896798	148899038
chr3	149088808	149089122
chr3	149103049	149103448
chr3	149111318	149111697
chr3	149118508	149120837
chr3	149132803	149133091
chr3	152578012	152578671
[truncated: 5,611 more rows]
